1 **Three-dimensional analysis of  $\beta$ -cell proliferation by a novel mouse model**

2

3 Shinsuke Tokumoto<sup>a</sup>, Daisuke Yabe<sup>a,b</sup>, Hisato Tatsuoka<sup>a</sup>, Ryota Usui<sup>a</sup>, Muhammad Fauzi<sup>a</sup>,  
4 Ainur Botagarova<sup>a</sup>, Hisanori Goto<sup>a</sup>, Pedro Luis Herrera<sup>c</sup>, Masahito Ogura<sup>a</sup>, Nobuya Inagaki<sup>a,\*</sup>

5

6 <sup>a</sup>Department of Diabetes, Endocrinology and Nutrition, Graduate School of Medicine, Kyoto  
7 University, 54 Kawara-cho, Shogoin, Sakyo-ku, Kyoto 606-8507, Japan

8

9 <sup>b</sup>Department of Diabetes and Endocrinology, Gifu University Graduate School of Medicine,  
10 Gifu, Japan

11

12 <sup>c</sup>Department of Genetic Medicine and Development, University of Geneva Medical School,  
13 Geneva, Switzerland.

14

15 \*Corresponding author (Nobuya Inagaki). Tel.: +81-75-751-3560, fax: +81-75-771-6601,  
16 email: inagaki@kuhp.kyoto-u.ac.jp

17

18

19

20

21

22

23

24

## 25 **Summary**

26 Inducing  $\beta$ -cell proliferation could inhibit diabetes progression. Many factors have been  
27 suggested as potential  $\beta$ -cell mitogens, but their impact on  $\beta$ -cell replication has not been  
28 confirmed due to the lack of a standardized  $\beta$ -cell proliferation assay. In this study, we  
29 developed a novel method that specifically labels replicating  $\beta$  cells and yields more  
30 reproducible results than current immunohistochemical assays. We established a mouse line  
31 expressing the fluorescent ubiquitination-based cell cycle indicator (Fucci2a) reporter only in  
32  $\beta$  cells through Cre-mediated recombination under the control of the rat insulin promoter  
33 (RIP-Cre;Fucci2aR). Three-dimensional imaging of optically cleared pancreas tissue from  
34 these mice enabled the quantification of replicating  $\beta$  cells in islets and morphometric  
35 analysis of islets following mitogen treatment. Intravital imaging of RIP-Cre;Fucci2aR mice  
36 revealed cell cycle progression of  $\beta$  cells. Thus, this novel mouse line is a powerful tool for  
37 spatiotemporal analysis of  $\beta$ -cell proliferation in response to mitogen stimulation.

38

## 39 **Introduction**

40 Diabetes is caused by  $\beta$ -cell dysfunction and deficiency. Stimulating  $\beta$ -cell  
41 proliferation is a promising treatment for diabetes, as  $\beta$  cells replicate very infrequently even  
42 in pathophysiological states. Many factors have been reported as potential  $\beta$ -cell mitogens,  
43 although the  $\beta$ -cell mitogenic effect by one of them has not been reproducible (Gusarova et  
44 al., 2014). The inconsistent results can be explained by the lack of a standardized method for  
45 quantifying replicating  $\beta$  cells (Cox et al., 2016). Thus far, determination of the  $\beta$ -cell  
46 proliferation rate has relied on immunohistochemical detection of cell cycle markers such as  
47 nucleotide analogs (5-bromo-2'-deoxyuridine [BrdU] and 5-ethynyl-2'-deoxyuridine [EdU])  
48 or replication proteins (proliferating cell nuclear antigen and Ki-67). However, results  
49 obtained by the immunohistochemical assays show inter-laboratory variability (Cox et al.,

50 2016) caused by methodological differences—e.g., in immunolabeling and image acquisition  
51 techniques. Replicating non- $\beta$  cells within islets may also confound immunohistochemical  
52 analyses. Furthermore, there are presently no alternative methods that can be used to resolve  
53 these discrepant findings. Thus, new methods for quantifying replicating  $\beta$  cells are required  
54 in order to validate the effects of potential  $\beta$ -cell mitogens.

55 The fluorescent ubiquitination-based cell cycle indicator (Fucci) reporter is a well-  
56 known probe for monitoring cell cycle status (Sakaue-Sawano et al., 2008). The Fucci system  
57 relies on the expression of a pair of fluorescent proteins: mCherry-hCdt1(30/120) (a degra-  
58 of chromatin licensing and DNA replication factor [Cdt]1 fused to a fluorescent protein in the  
59 red spectrum) and mVenus-hGem (1/110) (a degra- of Geminin fused to a fluorescent protein  
60 in the green spectrum). Reciprocal expression of these paired proteins labels cells in  $G_1$  phase  
61 and those in  $S/G_2/M$  phase with red and green fluorescence, respectively. Thus, the Fucci  
62 system can be used to visualize the  $G_1/S$  transition and quantify replicating cells.

63 In this study, we generated a mouse line in which only  $\beta$  cells expressing the Fucci  
64 probe are labeled according to cell cycle phase. Using this model, we specifically evaluated  
65  $\beta$ -cell proliferation induced by administration of the insulin receptor antagonist S961 (a  
66 reported  $\beta$ -cell mitogen [Jiao et al., 2014]). In addition, we performed three-dimensional (3D)  
67 analyses of whole islets by observing optically cleared pancreas of these mice and found a  
68 strong and significant correlation between islet size and the number of replicating  $\beta$  cells per  
69 islet. These results demonstrate the utility of this mouse model for the study of  $\beta$ -cell  
70 proliferation.

71

## 72 **Results**

### 73 *Generation of $\beta$ cell-specific Fucci-expressing mice*

74 To distinguish  $\beta$  cells in the  $G_0/G_1$  phase from those in  $S/G_2/M$  phase, we used Fucci

75 technology, which is a proven tool for detecting actively proliferating cells. The R26-  
76 Fucci2aR transgenic mouse line harboring an upgraded Fucci2a reporter was recently  
77 generated in which Cre/loxP-mediated conditional expression of the Fucci2a transgene at the  
78 Rosa26 locus is driven by the cytomegalovirus early enhancer/chicken  $\beta$  actin promoter  
79 (Mort et al., 2014). By crossing rat insulin promoter (RIP)-Cre (Herrera et al., 1998) and  
80 R26-Fucci2aR mice, we generated the RIP-Cre;Fucci2aR line in which the Fucci2a probe is  
81 specifically expressed in  $\beta$  cells (Fig. 1A). RIP-Cre;Fucci2aR mice showed similar body  
82 weight and arbitrary blood glucose levels compared to Fucci2aR littermates (Fig. 1B and 1C),  
83 and there was no significant difference in blood glucose and insulin levels during in the oral  
84 glucose tolerance test (2 g/kg) between them (Fig. 1D and 1E), indicating that RIP-Cre;  
85 Fucci2aR mice have a normal metabolic profile.

86

#### 87 *$\beta$ cell-specific Fucci expression in RIP-Cre;Fucci2aR mice*

88 As proof of principle, we investigated the expression pattern of the Fucci2a probe in  
89 RIP-Cre;Fucci2aR mice. In order to characterize not only mCherry<sup>+</sup> but also mVenus<sup>+</sup> cells,  
90 we induced  $\beta$ -cell proliferation in RIP-Cre;Fucci2aR mice by continuous infusion of the  
91 vehicle phosphate-buffered saline (PBS) or insulin receptor antagonist S961 over 7 days with  
92 an osmotic pump. At the end of the treatment, frozen sections were prepared from the  
93 dissected pancreas and immunostained for insulin, glucagon, somatostatin, and Nkx-6.1, and  
94 the fluorescent signals of the Fucci2a probe were directly observed. In S961-treated RIP-  
95 Cre;Fucci2aR mice, mCherry and mVenus were expressed specifically in insulin<sup>+</sup> and Nkx  
96 6.1<sup>+</sup> cells (Figure 2A and 2D), but not in glucagon<sup>+</sup> or somatostatin<sup>+</sup> cells (Figure 2B and  
97 2C). To ensure that replicating  $\beta$  cells could be quantified, we compared the results of the  
98 EdU assay and the  $\beta$ -cell proliferation assay performed using RIP-Cre;Fucci2aR mice.  
99 Vehicle- and S961-treated mice were administered EdU 6 h before sacrifice, and mVenus<sup>+</sup>

100 cells (Figure 2E) or EdU<sup>+</sup> insulin<sup>+</sup> DAPI<sup>+</sup> cells (Figure 2F) were counted in frozen sections.

101 We found that the value of mVenus<sup>+</sup> cells per  $\beta$  cells tended to be higher than that of EdU<sup>+</sup>

102 insulin<sup>+</sup> cells per  $\beta$  cells.

103

### 104 *3D Imaging of islets in RIP-Cre;Fucci2aR mice*

105 Since each islet is densely packed with various cell types, replicating  $\beta$  cells can be

106 misidentified in histological sections labeled for insulin and replication markers. In order to

107 detect and quantify replicating  $\beta$  cells in 3D in whole islets of RIP-Cre; Fucci2aR mice,

108 CUBIC clearing reagent (Kubota et al., 2017) was applied to pancreatic tissue samples from

109 vehicle- or S961-treated RIP-Cre;Fucci2aR mice, and 3D images of the optically cleared

110 tissue were obtained with a light sheet microscope equipped with a 5 $\times$  objective lens. The

111 spatial distributions of mVenus<sup>+</sup> and mCherry<sup>+</sup> cells were simultaneously visualized (Figure

112 3A–3F; Movie S1). Islets contained more mVenus<sup>+</sup> cells following S961 treatment (Figure

113 3C and 3D). Spot objects corresponding to each mVenus<sup>+</sup> or mCherry<sup>+</sup> cells were

114 reconstructed using Imaris Spot Detection and quantified by an automated process to

115 determine the number of replicating  $\beta$  cells in each islet (Figure 3G and 3H). The diameter of

116  $\beta$ -cell cluster in each islet were measured using Imaris Surface tool. Thus, RIP-Cre;Fucci2aR

117 mice are amenable to cross-sectional analyses of the number and spatial distribution of

118 proliferating  $\beta$  cells.

119 Given the utility of the Fucci2a probe for real-time monitoring of the cell cycle, we

120 performed real-time in vivo imaging in S961-treated RIP-Cre;Fucci2aR mice using a two-

121 photon microscope equipped with a 25 $\times$  water objective lens. This intravital imaging of an

122 islet in a RIP-Cre;Fucci2aR mouse initiated 40 h after S961 treatment revealed the G<sub>1</sub>-S

123 transitions of  $\beta$  cells (Supplemental Information Movies S2).

124

125 *The number of replicating  $\beta$  cells per islet is positively correlated with islet size*

126         The relationship between the number of replicating  $\beta$  cells per islet and the  
127 morphological characteristics of islets is unclear. We address this issue by analyzing 3D  
128 images obtained from RIP-Cre;Fucci2aR mice. Blood glucose and insulin levels were higher  
129 in mice treated with S961 (N = 4) than in those treated with vehicle (N = 4) (Figure 4A, 4B).  
130 When we examined all islets whose  $\beta$ -cell cluster diameter was over 100  $\mu$ m, the  $\beta$ -cell  
131 cluster diameter and  $\beta$ -cell number per islet were greater in S961-treated RIP-Cre; Fucci2aR  
132 mice (Figure 4C, 4D, 4E). In addition, the proportion of mVenus<sup>+</sup> cells per islet were higher  
133 in S961-treated as compared to control mice (Figure 4F). Moreover, the mVenus<sup>+</sup> cell  
134 number per islet was positively correlated with  $\beta$ -cell number per islet in both vehicle-treated  
135 (Figure 4G;  $r = 0.87$ ,  $P < 0.0001$ ) and S961-treated (Figure 4G;  $r = 0.84$ ,  $P < 0.0001$ ) mice.

136         Next, we investigated whether this positive correlation could be also found under a  
137 physiological condition such as diet-induced obesity. The RIP-Cre;Fucci2aR mice were  
138 divided into two groups: one fed with high-fat diets (HFD) and the other fed with control  
139 diets for 13 weeks. HFD group (N = 7) gained significantly more body weight than control  
140 diet group (N = 7) at the end of 13-week feedings (Figure 5A). Compared to control diet  
141 group, HFD group revealed greater  $\beta$ -cell cluster diameter (Figure 5B, 5C), more  $\beta$ -cell  
142 number per islet (Figure 5D) and higher proportion of mVenus<sup>+</sup> cells per islet (Figure 5E).  
143 Finally, the positive correlation between mVenus<sup>+</sup> cell number per islet and  $\beta$ -cell number per  
144 islet was also found in both HFD group (Figure 5F;  $r = 0.81$ ,  $P < 0.0001$ ) and control diet  
145 group (Figure 5F;  $r = 0.60$ ,  $P < 0.0001$ ). These data indicate that the number of replicating  $\beta$   
146 cells per islet depends on the size of the islet.

147

148  *$\beta$ -cell proliferation induced by S961 is not due to hyperglycemia*

149         Hyperglycemia has been shown to induce  $\beta$ -cell proliferation (Alonso et al., 2007;

150 Porat et al., 2011). Since S961 administration causes hyperglycemia, we investigated whether  
151 this mediates  $\beta$ -cell proliferation during S961 treatment. To exclude the effects of  
152 hyperglycemia, we normalized blood glucose levels in S961-treated RIP-Cre;Fucci2aR mice  
153 by co-administration of sodium–glucose cotransporter 2 inhibitor (SGLT2i). The mice were  
154 divided into four groups: vehicle treatment with control diet (vehicle + control), vehicle  
155 treatment with control diet containing 0.02% empagliflozin (vehicle + 0.02% empagliflozin),  
156 S961 treatment with control diet (S961 + control), and S961 treatment with control diet  
157 containing 0.02% empagliflozin (S961 + 0.02% empagliflozin). Although blood glucose level  
158 was higher in the S961 + control than in the S961 + 0.02% empagliflozin group, the level in  
159 the latter was similar to that in the vehicle + control group (Figure 6A). The S961 + 0.02%  
160 empagliflozin group had a lower insulin level than the S961 + control group but nonetheless  
161 showed hyperinsulinemia (Figure 6B), reflecting the continuous pharmacological action of  
162 S961 irrespective of empagliflozin co-administration.

163 We next investigated the morphological characteristics of islets in all four groups and  
164 found that islets were larger in mice treated with S961 as compared to vehicle (Figure 6C,  
165 6D, 6E).  $\beta$ -cell cluster diameter was larger in the vehicle + control as compared to the vehicle  
166 + 0.02% empagliflozin group, while no difference was observed between S961 + control and  
167 S961 + 0.02% empagliflozin groups (Figure 6C, 6D). On the other hand, while the number of  
168  $\beta$  cells per islet was greater in S961 + 0.02% empagliflozin group as compared to S961 +  
169 control group (Figure 6E), there was no difference in the proportion of mVenus<sup>+</sup> cells number  
170 per islet between the two groups (Figure 6F). In all four groups, there were positive  
171 correlations between mVenus<sup>+</sup> cell number and  $\beta$ -cell number per islet (vehicle + control:  $r =$   
172  $0.78$ ,  $P < 0.0001$ ; vehicle + 0.02% empagliflozin diet:  $r = 0.74$ ,  $P < 0.0001$ ; S961 + control  
173 diet:  $r = 0.92$ ,  $P < 0.0001$ ; and S961 + 0.02% empagliflozin diet:  $r = 0.90$ ,  $P < 0.0001$ ; Figure  
174 6G). These results indicate that hyperglycemia does not mediate S961-induced  $\beta$ -cell

175 replication.

176

## 177 **Discussion**

178 Identifying potential  $\beta$ -cell mitogens could lead to a novel diabetes therapy. Although  
179 many factors that control  $\beta$ -cell replication have been identified to date, their mitogenic  
180 effects on  $\beta$  cells have not been precisely evaluated since immunohistochemical assays are  
181 unreliable for accurately identifying  $\beta$  cells. A recent study reported inter-laboratory  
182 variability in the immunohistochemical detection of Ki-67 for the identification of  $\beta$  cells and  
183 quantification of their replication; the authors concluded that the discrepancy among  
184 laboratories was due to the misidentification of replicating non- $\beta$  cells within islets as  $\beta$  cells  
185 (Cox et al., 2016). Since many different cell types are densely packed in sphere-like islets, the  
186 analysis of 2D immunohistochemical data could account for inaccuracies in the detection of  $\beta$   
187 cells. Furthermore, the nucleotide analog BrdU, which is often used as a cell cycle marker in  
188 traditional immunohistochemical assays, has unfavorable effects on the cell cycle of  $\beta$  cells  
189 (de Castele et al., 2013). Thus, immunohistochemistry using cell cycle markers such as Ki-  
190 67 and BrdU are not appropriate for evaluating  $\beta$ -cell proliferation. In order to overcome  
191 these limitations, we developed a novel assay that can precisely detect and be used to  
192 quantify replicating  $\beta$  cells.

193 Fucci2a, a single fluorescence marker for monitoring cell cycle transition,  
194 differentiates cells in  $G_0/G_1$  from those in  $S/G_2/M$  phase based on mCherry-hCdt1 (30/120)  
195 and mVenus-hGem (1/110) expression (Sakaue-Sawano et al., 2008). Using RIP-  
196 Cre;Fucci2aR mice in which Fucci2a is expressed specifically in  $\beta$  cells, we established an  
197 assay for detecting the proliferative  $\beta$ -cell pool that is uncontaminated by replicating non- $\beta$   
198 cells. Our results also suggest that the Fucci2a assay is more sensitive than the short-term  
199 EdU labeling assay, which cannot detect  $\beta$  cells in  $G_2/M$  phase.



200 3D Analysis of RIP-Cre/Fucci2aR mice allows more precise evaluation of replicating  
201  $\beta$  cells, and increases the sample size compared to 2D immunohistochemical assays. We  
202 optically cleared pancreas tissue samples from RIP-Cre/Fucci2aR mice for 3D fluorescence  
203 imaging, which provided spatial information on replicating  $\beta$  cells within each islet. This 3D  
204 analysis allowed us to examine the correlation between  $\beta$ -cell proliferative capacity and the  
205 morphological characteristics of each islet. Furthermore, intravital imaging demonstrated that  
206 longitudinal spatiotemporal data on  $\beta$ -cell proliferation can be obtained from RIP-  
207 Cre/Fucci2aR mice. The 3D analysis of the pancreas of RIP-Cre/Fucci2aR mice revealed a  
208 higher  $\beta$ -cell proliferation rate within each islet in mice treated with S961 than in those  
209 treated with vehicle. When we counted all mCherry<sup>+</sup> and mVenus<sup>+</sup> cells as  $\beta$  cells, we found  
210 that the total number of  $\beta$  cells per islet was increased by S961 treatment. This is consistent  
211 with previous reports on S961-induced  $\beta$  cell proliferation and mass expansion (Jiao et al.,  
212 2014). In addition, the strong positive correlation between mVenus<sup>+</sup> cell and total  $\beta$ -cell  
213 number per islet suggested that larger islets contain more replicating  $\beta$  cells.

214 The signals that regulate  $\beta$ -cell proliferation upon S961 treatment are not known.  
215 Hyperglycemia has been reported to directly induce  $\beta$ -cell proliferation, while a recent study  
216 showed that S961-induced hyperinsulinemia and  $\beta$  cell mass expansion occurred even when  
217 blood glucose levels were normalized by co-administration of a monoclonal glucagon  
218 receptor antibody (Okamoto et al., 2017). Our results showed that S961 stimulated  $\beta$ -cell  
219 proliferation and increased  $\beta$ -cell number per islet even when hyperglycemia was normalized  
220 by SGLT2i treatment. These results provide new evidence for the existence of mitogenic  
221 factors mediating S961-induced  $\beta$ -cell proliferation, except under hyperglycemic conditions.

222 Our study had several limitations. Firstly, since only  $\beta$  cells were labeled by the  
223 Fucci2a probe, other endocrine cells within islets could not be detected in RIP-Cre;Fucci2aR  
224 mice. Therefore, mitogenic effects on non- $\beta$  cells must be investigated using other methods.

225 Secondly, the attenuation of fluorescence by light scattering limited the observation depth  
226 from the pancreas surface. Such signal attenuation is unavoidable despite the optical clearing  
227 process. Under the light sheet microscope, only islets near (~2.0 mm from) the surface were  
228 clearly detected for quantification of fluorescent cells. Although this restricts the size of the  
229 islet population, the sample size is still larger using our method as compared to a  
230 conventional immunohistochemical assay because it is based on 3D analysis of the whole  
231 pancreas.

232 In summary, the transgenic mouse line expressing the Fucci2a probe in  $\beta$  cells  
233 developed in this study provides a new tool for analyzing  $\beta$ -cell proliferation in a more  
234 reliable and reproducible manner than conventional immunohistochemistry. The high spatial  
235 resolution of the 3D images obtained with a light-sheet microscope allows accurate detection  
236 of replicating  $\beta$ -cells. This system can be useful for validating the efficacy and therapeutic  
237 potential of  $\beta$ -cell mitogens for inhibition of diabetes progression.

238

### 239 **Acknowledgments**

240 The authors thank Asako Sakaue-Sawano and Atsushi Miyawaki for their scientific  
241 discussion; Saki Kanda and Sara Yasui for technical assistance; and Yukiko Inokuchi,  
242 Yukiko Tanaka, and Fumiko Uwamori for secretarial assistance. This work was supported by  
243 Kyoto University Live Imaging Center and in part by Grants-in-Aid KAKENHI 16H06280  
244 “ABiS”.

245

### 246 **Author Contributions**

247 The study was designed by S.T., D.Y., and N.I. Experiments were performed by S.T. and  
248 A.B., and data were analyzed by S.T. The manuscript was written by S.T., D.Y., and N.I.  
249 with input from all authors.

250

251 **Declaration of Interests**

252 S. Tokumoto reports no conflict of interests relevant to this study. D. Yabe received  
253 consulting or speaking fees from MSD K.K., Nippon Boehringer Ingelheim Co. Ltd., and  
254 Novo Nordisk Pharma Ltd. D. Yabe also received clinically commissioned/joint research  
255 grants from Taisho Toyama Pharmaceutical Co. Ltd., MSD K.K., Ono Pharmaceutical Co.  
256 Ltd., Novo Nordisk Pharma Ltd., Arklay Co. Ltd., Terumo Co. Ltd., and Takeda  
257 Pharmaceutical Co. Ltd. N. Inagaki received clinical commissioned/joint research grants from  
258 Mitsubishi Tanabe, AstraZeneca, Astellas, and Novartis Pharma and scholarship grants  
259 from Takeda, MSD, Ono, Sanofi, Japan Tobacco Inc., Mitsubishi Tanabe, Novartis,  
260 Boehringer Ingelheim, Kyowa Kirin, Astellas, and Daiichi-Sankyo.

261

262

263 **Figure legends**

264 **Figure 1. Genotype and metabolic phenotype of RIP-Cre;Fucci2aR mice.** (A) Breeding  
265 scheme for the generation of RIP-Cre;Fucci2aR mice. RIP-Cre and Fucci2aR mouse lines  
266 were crossed to obtain RIP-Cre;Fucci2aR mice. After Cre-mediated recombination, the  
267 Fucci2a transgene was expressed specifically in  $\beta$  cells. (B) Body weight and (C) arbitrary  
268 blood glucose levels of RIP-Cre;Fucci2aR (N = 7) and Fucci2aR control (N = 7) mice during  
269 postnatal growth. (D, E) Oral glucose tolerance test (2 g/kg body weight) was performed on  
270 RIP-Cre; Fucci2aR (N = 7) and Fucci2aR control (N = 7) mice at 8 weeks. Data are  
271 expressed as mean  $\pm$  SEM. \*P < 0.05 (Mann-Whitney U test).

272

273 **Figure 2.  $\beta$  Cell-specific expression of Fucci2a in RIP-Cre;Fucci2aR mice.** (A–D) Frozen

274 sections of pancreas tissue from RIP-Cre;Fucci2aR mice treated with S961 at 8 weeks of age  
275 immunostained for islet hormones and Nkx 6.1. Representative fluorescence images of  
276 mCherry<sup>+</sup> (red) and mVenus<sup>+</sup> (yellow) cells and immunofluorescence for islet hormones  
277 (green): insulin (A), glucagon (B), and somatostatin (C). (D) All mCherry<sup>+</sup> (red) and  
278 mVenus<sup>+</sup> (green) cells were Nkx 6.1-positive (yellow). Nuclei were stained with DAPI  
279 (blue). Scale bar, 100  $\mu$ m. (E) Quantification of mVenus<sup>+</sup> cells in the islets of RIP-  
280 Cre;Fucci2aR mice treated with vehicle (PBS; N = 4) or S961 (10 nM/week; N = 4). \*P <  
281 0.05. (F) Quantification of EdU<sup>+</sup>  $\beta$  cells in islets of RIP-Cre;Fucci2aR mice treated with  
282 vehicle (PBS; N = 4) or S961 (10 nM/week; N = 4). \*P < 0.05. Data are expressed as mean  $\pm$   
283 SEM.

284

### 285 **Figure 3. 3D Imaging of islets in vehicle- and S961-treated RIP-Cre;Fucci2aR mice.**

286 Representative 3D images of islets following treatment for 1 week with vehicle or S961. (A,  
287 B) Representative fluorescence images of mCherry<sup>+</sup> (red) and (C, D) mVenus<sup>+</sup> (green) cells.  
288 (G, H) Morphological 3D reconstruction of mCherry<sup>+</sup> (red) and mVenus<sup>+</sup> (green) cells for  
289 automated cell counting. Images were obtained with a light-sheet microscope. Scale bar, 50  
290  $\mu$ m.

291

### 292 **Figure 4. Quantification of replicating $\beta$ cells in RIP-Cre;Fucci2aR mice following S961** 293 **treatment.**

294 (A, B) RIP-Cre;Fucci2aR mice were treated with S961 (10 nM/week; N = 4) or vehicle (PBS;  
295 N = 4) for 7 days. (A) Arbitrary blood glucose and (B) serum insulin levels at the end of the  
296 7-day treatment. (C) Histogram of  $\beta$ -cell cluster diameter in S961- and vehicle-treated RIP-  
297 Cre;Fucci2aR mice. Morphometric analysis was performed on islets harboring  $\beta$ -cell clusters  
298 with a diameter > 100  $\mu$ m (S961, n = 454 islets, N = 4 mice; vehicle, n = 348 islets, N = 4

299 mice). (D)  $\beta$ -cell cluster diameter in S961- and vehicle-treated mice. \*\*\*\*P < 0.0001 (N = 4).  
300 (E) Number of  $\beta$  cells per islet in S961- or vehicle-treated mice. \*P < 0.05 (N = 4). (F)  
301 Percentage of mVenus<sup>+</sup> cells per islet in S961- and vehicle-treated mice. \*\*\*\*P < 0.0001 (N  
302 = 4). (G) Correlation between number of mVenus<sup>+</sup> cells and number of  $\beta$  cells per islet.  
303 mVenus<sup>+</sup> cell number and  $\beta$  cell number per islet was strongly correlated in both groups  
304 (S961, r = 0.87, P < 0.0001; vehicle, r = 0.77, P < 0.0001). Data are presented as mean  $\pm$   
305 SEM.

306

307 **Figure 5. Quantification of replicating  $\beta$  cells in RIP-Cre;Fucci2aR mice following**  
308 **high-fat diet feeding.**

309 (A) Body weight of RIP-Cre;Fucci2aR mice fed with high-fat diets (HFD; N = 7) or control  
310 diets (Control; N = 7) for 13 weeks. (B) Histogram of  $\beta$ -cell cluster diameter in RIP-  
311 Cre;Fucci2aR mice under HFD or control diet feeding. Morphometric analysis was  
312 performed on islets harboring  $\beta$ -cell clusters with a diameter > 100  $\mu$ m (HFD, n = 407 islets,  
313 N = 4 mice; Control, n = 432 islets, N = 4 mice). (C)  $\beta$ -cell cluster diameter. \*\*\*\*P < 0.0001  
314 (N = 4). (D) Number of  $\beta$  cells per islet. \*\*\*\*P < 0.0001 (N = 4). (E) Percentage of mVenus<sup>+</sup>  
315 cells per islet. \*\*\*\*P < 0.0001 (N = 4). (F) Correlation between number of mVenus<sup>+</sup> cells and  
316 number of  $\beta$  cells per islet. mVenus<sup>+</sup> cell number and  $\beta$  cell number per islet was strongly  
317 correlated in both groups (HFD, r = 0.81, P < 0.0001; Control, r = 0.60, P < 0.0001). Data are  
318 presented as mean  $\pm$  SEM.

319

320 **Figure 6. S961-induced  $\beta$  cell proliferation is not mediated by hyperglycemia.**

321 (A, B) RIP-Cre;Fucci2aR mice were divided into four groups: 1) vehicle + control, treated  
322 with vehicle and fed a control diet (N = 6); 2) vehicle + 0.02% empagliflozin, treated with

323 vehicle and fed a diet supplemented with 0.02% empagliflozin (N = 6); 3) S961 + control,  
324 treated with S961 (10 nM/week) and fed a control diet (N = 6); and 4) S961 + 0.02%  
325 empagliflozin, treated with S961 (10 nM/week) and fed a diet supplemented with 0.02%  
326 empagliflozin (N = 6). (A) Arbitrary blood glucose levels. \*P < 0.05, S961 + control diet  
327 group vs. S961 + 0.02% empagliflozin group. †P < 0.05, S961 + 0.02% empagliflozin group  
328 vs. Vehicle + control group. ‡P < 0.05, vehicle + control group vs. vehicle + 0.02%  
329 empagliflozin group. (B) Serum insulin levels at the end of the 7-day treatment. \*P < 0.05,  
330 S961 + control group vs. S961 + 0.02% empagliflozin group. (C) Histogram of  $\beta$ -cell cluster  
331 diameter. Morphometric analysis was performed on islets harboring  $\beta$ -cell clusters with a  
332 diameter > 100  $\mu$ m (vehicle + control, N = 4 mice, n = 496 islets; vehicle + 0.02%  
333 empagliflozin, N = 4 mice, n = 440 islets; S961 + control, N = 4 mice, n = 544 islets; S961 +  
334 0.02% empagliflozin, N = 4 mice, n = 391 islets). (D)  $\beta$ -cell cluster diameter, (E) number of  $\beta$   
335 cells per islet, and (F) percentage of mVenus<sup>+</sup> cells per islet. \*\*P < 0.01 (N = 4), \*\*\*P <  
336 0.001 (N = 4), \*\*\*\*P < 0.0001 (N = 4); ns, not significant. (G) Correlation between number  
337 of mVenus<sup>+</sup> cells and number of  $\beta$  cells per islet. mVenus<sup>+</sup> cell and  $\beta$ -cell number per islet  
338 were strongly correlated in all groups (vehicle + control, r = 0.70, P < 0.0001; vehicle +  
339 0.02% empagliflozin diet, r = 0.61, P < 0.0001; S961 + control diet, r = 0.93, P < 0.0001; and  
340 S961 + 0.02% empagliflozin diet, r = 0.88, P < 0.0001). V + C, vehicle + control; V + E,  
341 vehicle + 0.02% empagliflozin diet; S + C, S961 + control diet; S + E, S961 + 0.02%  
342 empagliflozin diet. Data are presented as mean  $\pm$  SEM.  
343

344 **STAR Methods**

345 CONTACT FOR REAGENT AND RESOURCE SHARING

346 Further information and requests for resources and reagents should be directed to and will be  
347 fulfilled by the Lead Contact, Nobuya Inagaki (inagaki@kuhp.kyoto-u.ac.jp). RIP-Cre mice  
348 were obtained under Material Transfer Agreements from Prof. Pedro L. Herrera. Fucci2aR  
349 mouse strain (RBRC06511) was provided by RIKEN BRC through the National BioResource  
350 Project of the MEXT/AMED, Japan.

351

352 EXPERIMENTAL MODEL AND SUBJECT DETAILS

353 *Generation of the transgenic mouse line*

354 To establish the mouse model for studying  $\beta$ -cell proliferation, we used mice harboring R26-  
355 Fucci2aR (RIKEN BRC through Kyoto University Medical Science and Business Liaison  
356 Organization). This newer Fucci2a reporter is a bicistronic Cre-inducible probe consisting of  
357 two fluorescent proteins: truncated Cdt1 (30/120) fused to mCherry, and truncated Geminin  
358 (1/110) fused to mVenus. The two fusion proteins are always alternately expressed according  
359 to cell cycle phase in the same ratio, making it possible to detect and quantify the number of  
360 labeled cells. By crossing Rip-Cre and Fucci2aR mice, we generated RIP-Cre;Fucci2aR mice  
361 expressing the Fucci2a reporter in a  $\beta$  cell-specific manner. In these RIP-Cre;Fucci2aR mice,  
362 mCherry-hCdt1 (30/120) (red fluorescence) and mVenus-hGem (1/110) (green fluorescence)  
363 are expressed in  $\beta$  cell nuclei during G0/G1 and S/G2/M phases, respectively. Only  
364 hemizygous males on the C57BL/6 background were used in this study. Mice had free access  
365 to standard rodent chow and water and were housed in a temperature-controlled environment  
366 under a 14:10-h light/dark cycle. Animal care and protocols were reviewed and approved by  
367 the Animal Care and Use Committee of Kyoto University Graduate School of Medicine  
368 (MedKyo15298).

369

## 370 METHOD DETAILS

### 371 *In vivo mouse studies*

372 S961 was obtained from Novo Nordisk (Bagsværd, Denmark). Vehicle (PBS) or 10 nmol  
373 S961 was loaded into an osmotic pump (Alzet 2001; DURECT Corp., Cupertino, CA, USA)  
374 subcutaneously implanted into the back of RIP-Cre;Fucci2aR mice at 8 weeks of age. Mice  
375 were euthanized and the pancreas was harvested 7 days after S961 or vehicle treatment.  
376 Blood glucose levels were measured daily. Plasma was collected on days 0 and 7 to measure  
377 insulin level. For a model of diet-induced obesity, six-week old RIP-Cre;Fucci2aR mice were  
378 fed with high-fat diets (Research Diet, cat. no. D12492) or control diets (Research Diet, cat.  
379 no. D12450J) for 13 weeks, and body weight were measured weekly. For the EdU labeling  
380 assay, mice were intraperitoneally injected with EdU (50 mg/kg) 6 h before sacrifice.

381

### 382 *Oral glucose tolerance test*

383 Mice were fasted for 16 h and then orally administered a 20% glucose solution (2 g/kg body  
384 weight). Blood samples were collected from the tail vein of mice 0, 15, and 30 min after  
385 glucose loading using heparinized calibrated glass capillary tubes (cat. no. 2-000-044-H;  
386 Drummond Scientific Co., Broomall, PA, USA). Blood glucose level was measured using the  
387 Glutest Neo Sensor (Sanwa Kagaku Kenkyusho, Nagoya, Japan). Plasma samples were  
388 prepared by centrifuging the blood samples at  $9000 \times g$  for 10 min, and insulin level was  
389 measured using the Ultra Sensitive PLUS Mouse Insulin ELISA kit (cat. no. 49170-53;  
390 Morinaga, Tokyo, Japan).

391

### 392 *Immunohistochemical observation of tissue sections*

393 Mice were anesthetized by intraperitoneal injection of pentobarbital sodium (10 mg/kg); a 26-



394 gauge needle was inserted into the left ventricle through the apex, and the mice were  
395 transcardially perfused with cold PBS followed by cold 4% paraformaldehyde (PFA, Wako  
396 Pure Chemical Industries, Osaka, Japan). The harvested pancreas was immediately immersed  
397 in PFA at 4°C with gentle shaking for less than 24 h, and then embedded in Optimal Cutting  
398 Temperature compound. Frozen samples were cut into 8- $\mu$ m sections. After air drying, the  
399 frozen sections were incubated with blocking buffer composed of PBS with 10% (v/v) goat  
400 serum and 0.2% (v/v) Triton-X100) for 30 min at room temperature, and then incubated  
401 overnight at room temperature in blocking buffer supplemented with rabbit anti-insulin (200-  
402 fold dilution; cat. no. ab181547), mouse anti-glucagon (2000-fold dilution; cat. no. ab10988),  
403 rat anti-somatostatin (100-fold dilution; cat. no. ab30788), or rabbit anti-Nkx 6.1 (100-fold  
404 dilution; cat. no. ab221549) antibody (all from Abcam, Cambridge, MA, USA), followed by  
405 Alexa Fluor 647-conjugated goat anti-rabbit IgG (H+L) (200-fold dilution; cat. no. A-21245;  
406 Thermo Fisher Scientific, Waltham, MA, USA), Alexa Fluor 647-conjugated goat anti-mouse  
407 IgG (H+L) (200-fold dilution; cat. no. ab150115; Abcam), or Alexa Fluor 647-conjugated  
408 goat anti-rat IgG (H+L) (200-fold dilution; cat. no. ab150159; Abcam) for 1 h at room  
409 temperature. The sections were incubated in PBS containing DAPI (final concentration: 0.01  
410 mg/ml) for 15 min at room temperature and mounted with Vectashield (Vector Laboratories,  
411 Burlingame, CA, USA) on 24  $\times$  40-mm coverslips (cat. no. C024401; Matsunami Glass,  
412 Osaka, Japan). Immunolabeled tissue sections were observed with an inverted fluorescence  
413 microscope (BZ-X710; Keyence, Osaka, Japan). EdU was detected using the Click-iT EdU  
414 Alexa Fluor 647 kit (Thermo Fisher Scientific) according to the manufacturer's protocol.

415

#### 416 *Tissue clearing*

417 Pancreas tissue samples were collected and fixed as described above, washed three times for  
418 more than 2 h each time in PBS at room temperature with gentle shaking. For delipidation

419 and permeabilization, the samples were immersed in 50% (v/v) CUBIC-L clearing reagent  
420 for at least 6 h followed by CUBIC-L at 37°C with gentle shaking for 3 days. The CUBIC-L  
421 reagent was refreshed daily during this period. After clearing, samples were immersed in  
422 50% (v/v) CUBIC-R for at least 6 h and in CUBIC-R at room temperature with gentle  
423 shaking for at least 2 days.

424

### 425 *3D Imaging*

426 3D Images of optically cleared pancreas tissue were acquired with a light-sheet microscope  
427 (Lightsheet Z.1; Carl Zeiss, Oberkochen, Germany) equipped with a 5×/0.16 NA objective  
428 lens. For mCherry-hCdt1 (30/120) imaging, we used 22% laser power (561-nm laser) and a  
429 28-ms exposure time. For mVenus-hGem (1/110) imaging, we used 90% laser power (488-  
430 nm laser) and a 70-ms exposure time. The z-stack images (1920 × 1920 pixel, 16-bit) were  
431 acquired at 4.63 μm intervals.

432

### 433 *Intravital imaging*

434 Following S961 treatment for 40 h, RIP-Cre;Fucci2aR mice were anesthetized by 1.5%–2%  
435 isoflurane (Wako Pure Chemical Industries) inhalation. The hair on the abdominal area was  
436 removed and skin disinfected with 70% ethanol. A small oblique incision running parallel to  
437 the last left rib was made to expose the pancreas on the left side of the abdominal wall. The  
438 mice then were placed in the supine position on an electric heating pad maintained at 37°C.  
439 The pancreas was immobilized using a suction imaging device (Figure S1), and time-lapse  
440 imaging was performed with a two-photon excitation microscope (FV1200MPE-BX61WI;  
441 Olympus, Tokyo, Japan) equipped with a 25×/1.05 NA water-immersion objective lens  
442 (XLPLN 25XWMP; Olympus) and an In-Sight DeepSee Ultrafast laser (Spectra Physics,  
443 Santa Clara, CA, USA). Images were acquired every 5 min for ~10 h in 5-μm steps at a scan

444 speed of 20  $\mu$ s/pixel. Mice were euthanized after imaging.

445

#### 446 *Image processing*

447 Acquired images were analyzed with the 3D reconstruction software Imaris (Bitplane AG,  
448 Zurich, Switzerland). A whole series of consecutive 2D cross-sectional images was  
449 reconstructed into a 3D structure using the “Volume rendering” function. Each islet was then  
450 isolated using the “Crop 3D function”, and a Gaussian filter was applied for background  
451 noise reduction. A spot detection algorithm was used for automated cell identification and  
452 cell counts. Morphometric measurements of maximum diameter of  $\beta$  cells within each islet  
453 were obtained using the Imaris surface creation tool.

454

#### 455 *Quantification and statistical analysis*

456 The Mann–Whitney U test was performed to evaluate the difference between two sets of data.  
457 P values < 0.05 were considered statistically significant. No statistical method was used to  
458 predetermine sample size. Statistical analyses were performed using GraphPad Prism  
459 (GraphPad Software, La Jolla, CA, USA).

460

#### 461 **Supplemental Information**

462 **Figure S1.** Experimental setup of intravital pancreas imaging by two-photon microscopy,  
463 Related to STAR Methods section.

464

465 **Movie S1.** 3D Imaging of Islets in RIP-Cre;Fucci2aR mice, Related to Figure 3

466 The movie shows how 3D images of islets were edited and analyzed using Imaris software.

467

468 **Movie S2.** *In vivo* imaging of an islet in a RIP-Cre;Fucci2aR mouse, Related to Figure 3

469 The movie shows the G1-S transitions in two  $\beta$  cells, which are also automatically detected  
470 using the cell-tracking tool in Imaris. Scale bars, 50  $\mu\text{m}$ . Time is shown in hours:minutes.

471

## 472 **References**

- 473 Alonso, L.C., Yokoe, T., Zhang, P., Scott, D.K., Kim, S.K., O'Donnell, C.P., and Garcia-  
474 Ocaña, A. (2007). Glucose infusion in mice: a new model to induce beta-cell replication.  
475 *Diabetes* 56, 1792–1801.
- 476 Cox, A. R., Barrandon, O., Cai, E.P., Rios, J.S., Chavez, J., Bonnyman, C.W., Lam, C.J., Yi,  
477 P., Melton, D.A., and Kushner, J.A. (2016). Resolving discrepant findings on ANGPTL8  
478 in  $\beta$ -cell proliferation: a collaborative approach to resolving the betatrophin controversy.  
479 *PLoS One* 11, e0159276.
- 480 de Castele, M.V., Cai, Y., Leuckx, G., and Heimberg, H. (2013). Mouse beta cell  
481 proliferation is inhibited by thymidine analogue labelling. *Diabetologia* 56, 2647–2650.
- 482 Gusarova, V., Alexa, C.A., Na, E., Stevis, P.E., Xin, Y., Bonner-Weir, S., Cohen, J.C.,  
483 Hobbs, H.H., Murphy, A.J., Yancopoulos, G.D., and Gromada, J. (2014).  
484 ANGPTL8/betatrophin does not control pancreatic beta cell expansion. *Cell* 159, 691–  
485 696.
- 486 Herrera, P.-L., Orci, L., and Vassalli, J.-D. (1998). Two transgenic approaches to define the  
487 cell lineages in endocrine pancreas development, *Mol. Cell. Endocrinol.* 140, 45–50.
- 488 Jiao, Y., Lay, J.L., Yu, M., Najj, A., and Kaestner, K.H. (2014). Elevated mouse hepatic  
489 betatrophin expression does not increase human  $\beta$ -cell replication in the transplant  
490 setting. *Diabetes* 63, 1283–1288.
- 491 Kubota, S. I., Takahashi, K., Nishida, J., Morishita, Y., Ehata, S., Tainaka, K., Miyazono, K.,  
492 and Ueda, H.R. (2017). Whole-body profiling of cancer metastasis with single-cell  
493 resolution. *Cell Rep.* 20, 236–250.

494 Mort, R.L., Ford, M.J., Sakaue-Sawano, A., Lindstrom, N.O., Casadio, A., Douglas, A.T.,  
495 Keighren, M.A., Hohenstein, P., Miyawaki, A., and Jackson, I.J. (2014). Fucci2a: A  
496 bicistronic cell cycle reporter that allows Cre mediated tissue specific expression in  
497 mice. *Cell Cycle* *13*, 2681–2696.

498 Okamoto, H., Cavino, K., Na, E., Krumm, E., Kim, S.Y., Cheng, X., Murphy, A.J.,  
499 Yancopoulos, G.D., and Gromada, J. (2017). Glucagon receptor inhibition normalizes  
500 blood glucose in severe insulin-resistant mice. *Proc. Natl. Acad. Sci. U S A* *114*, 2753–  
501 2758.

502 Porat, S., Weinberg-Corem, N., Tornovsky-Babaey, S., Schyr-Ben-Haroush, R., Hija, A.,  
503 Stolovich-Rain, M., Dadon, D., Granot, Z., Ben-Hur, V., White, P., Girard, C.A., Karni,  
504 R., Kaestner, K.H., Ashcroft, F.M., Magnuson, M.A., Saada, A., Grimsby, J., Glaser, B.,  
505 and Dor, Y. (2011). Control of pancreatic beta cell regeneration by glucose metabolism.  
506 *Cell Metabol.* *13*, 440–449.

507 Sakaue-Sawano, A., Kurokawa, H., Morimura, T., Hanyu, A., Hama, H., Osawa, H.,  
508 Kashiwagi, S., Fukami, K., Miyata, T., Miyoshi, H., Imamura, T., Ogawa, M., Masai, H.,  
509 and Miyawaki, A. (2008). Visualizing spatiotemporal dynamics of multicellular cell-  
510 cycle progression. *Cell* *132*, 487–498.

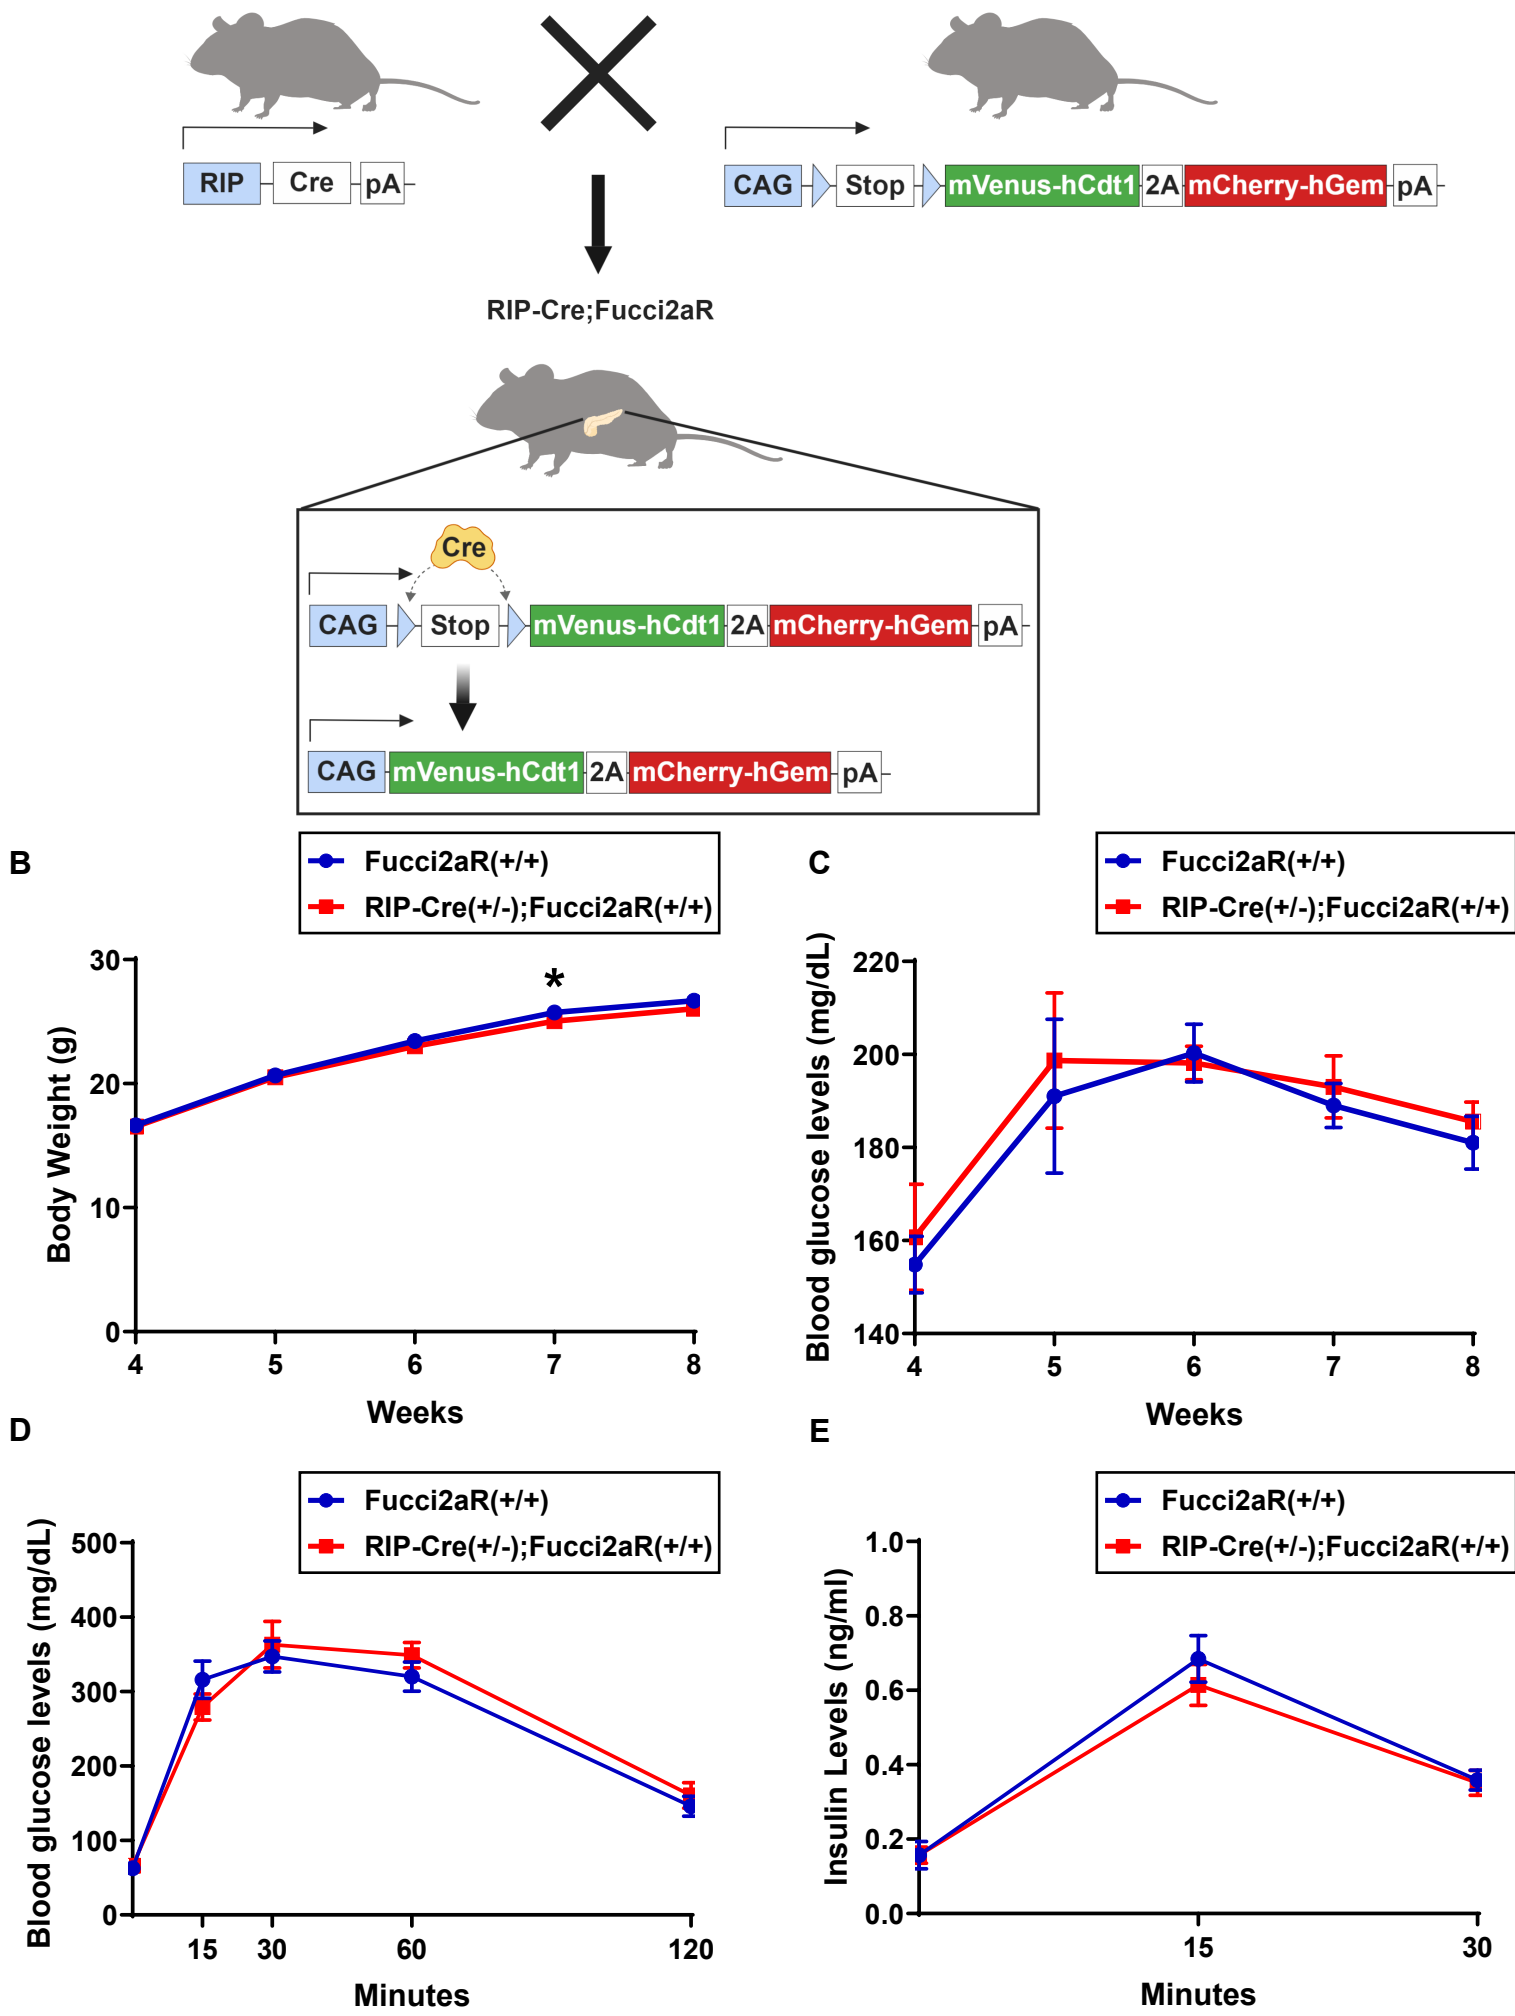

**A**

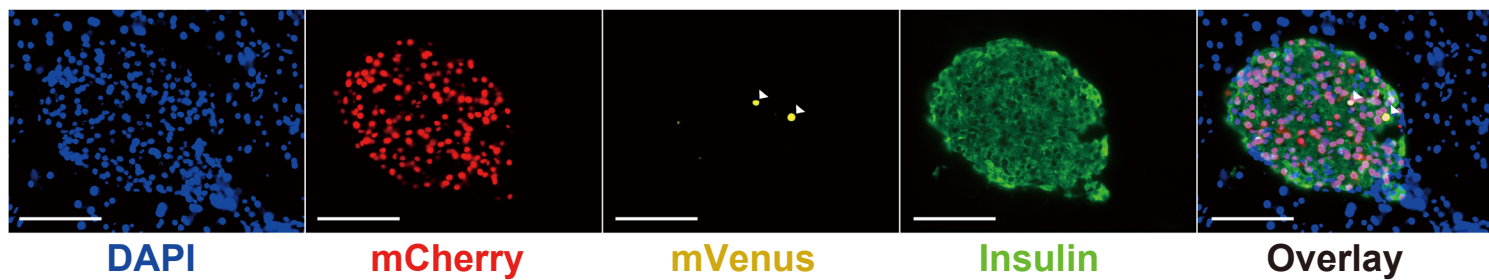

**B**

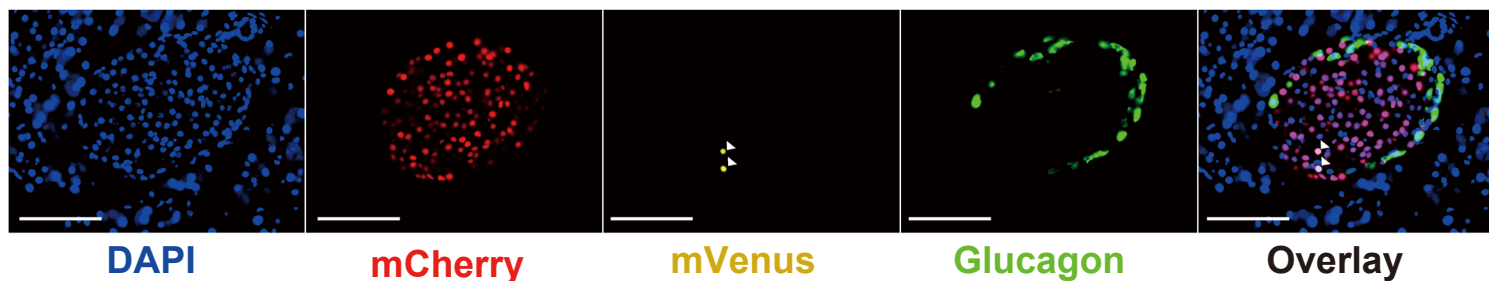

**C**

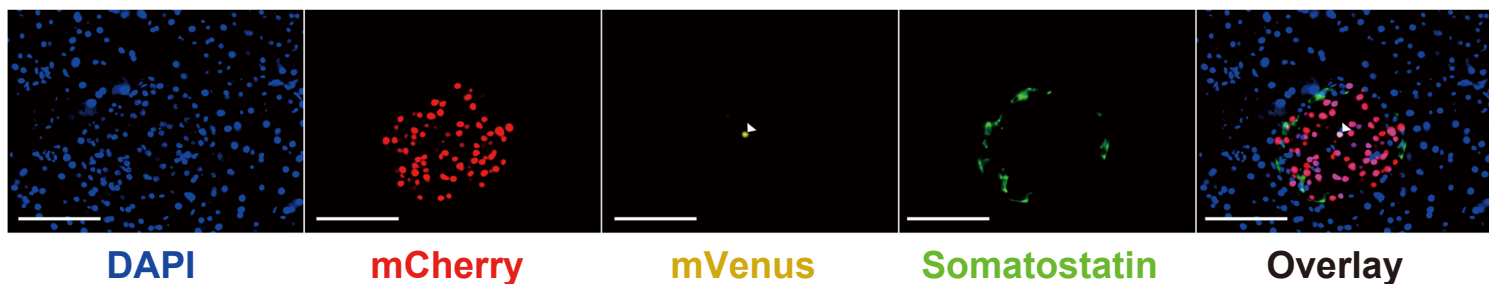

**D**

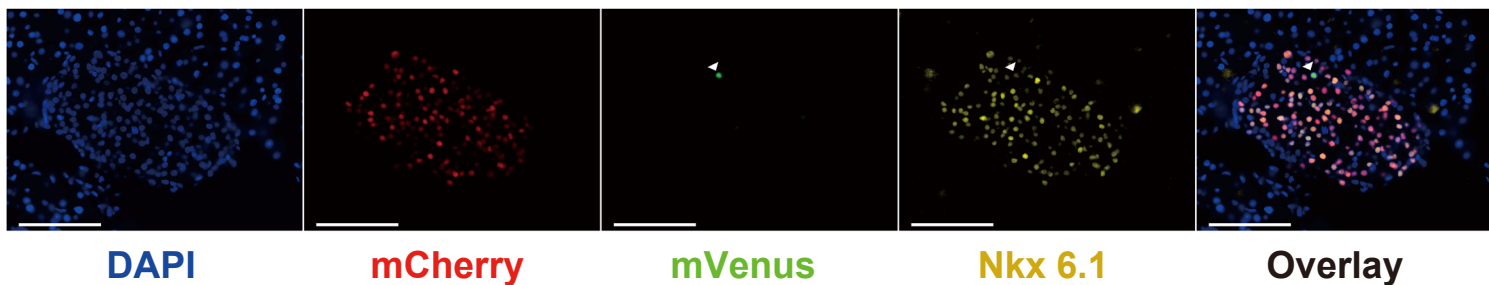

**E**

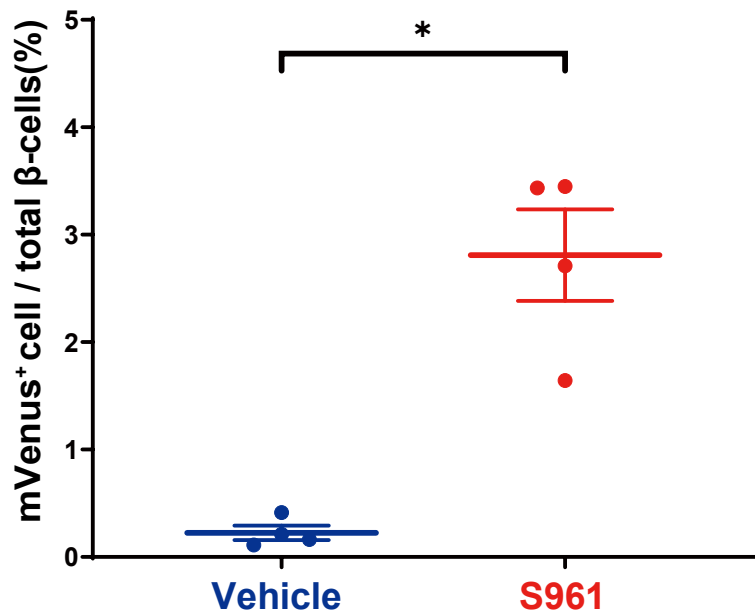

**F**

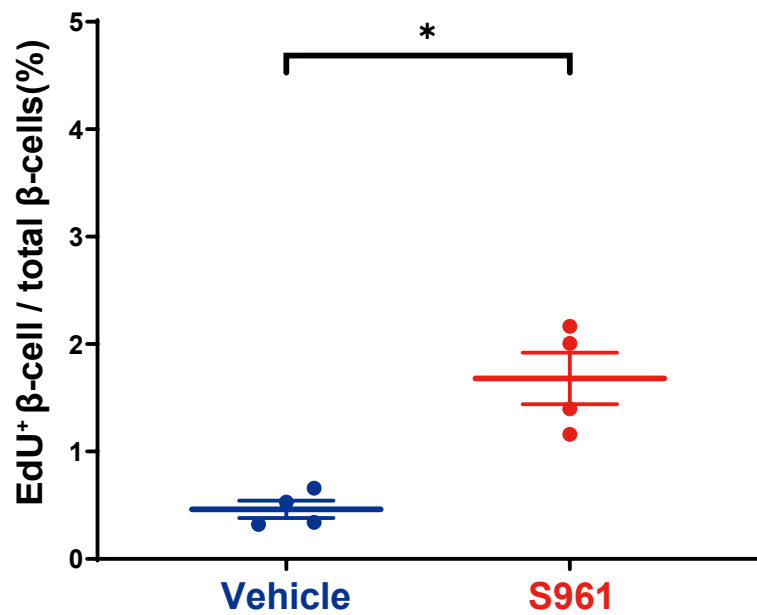

Figure 3

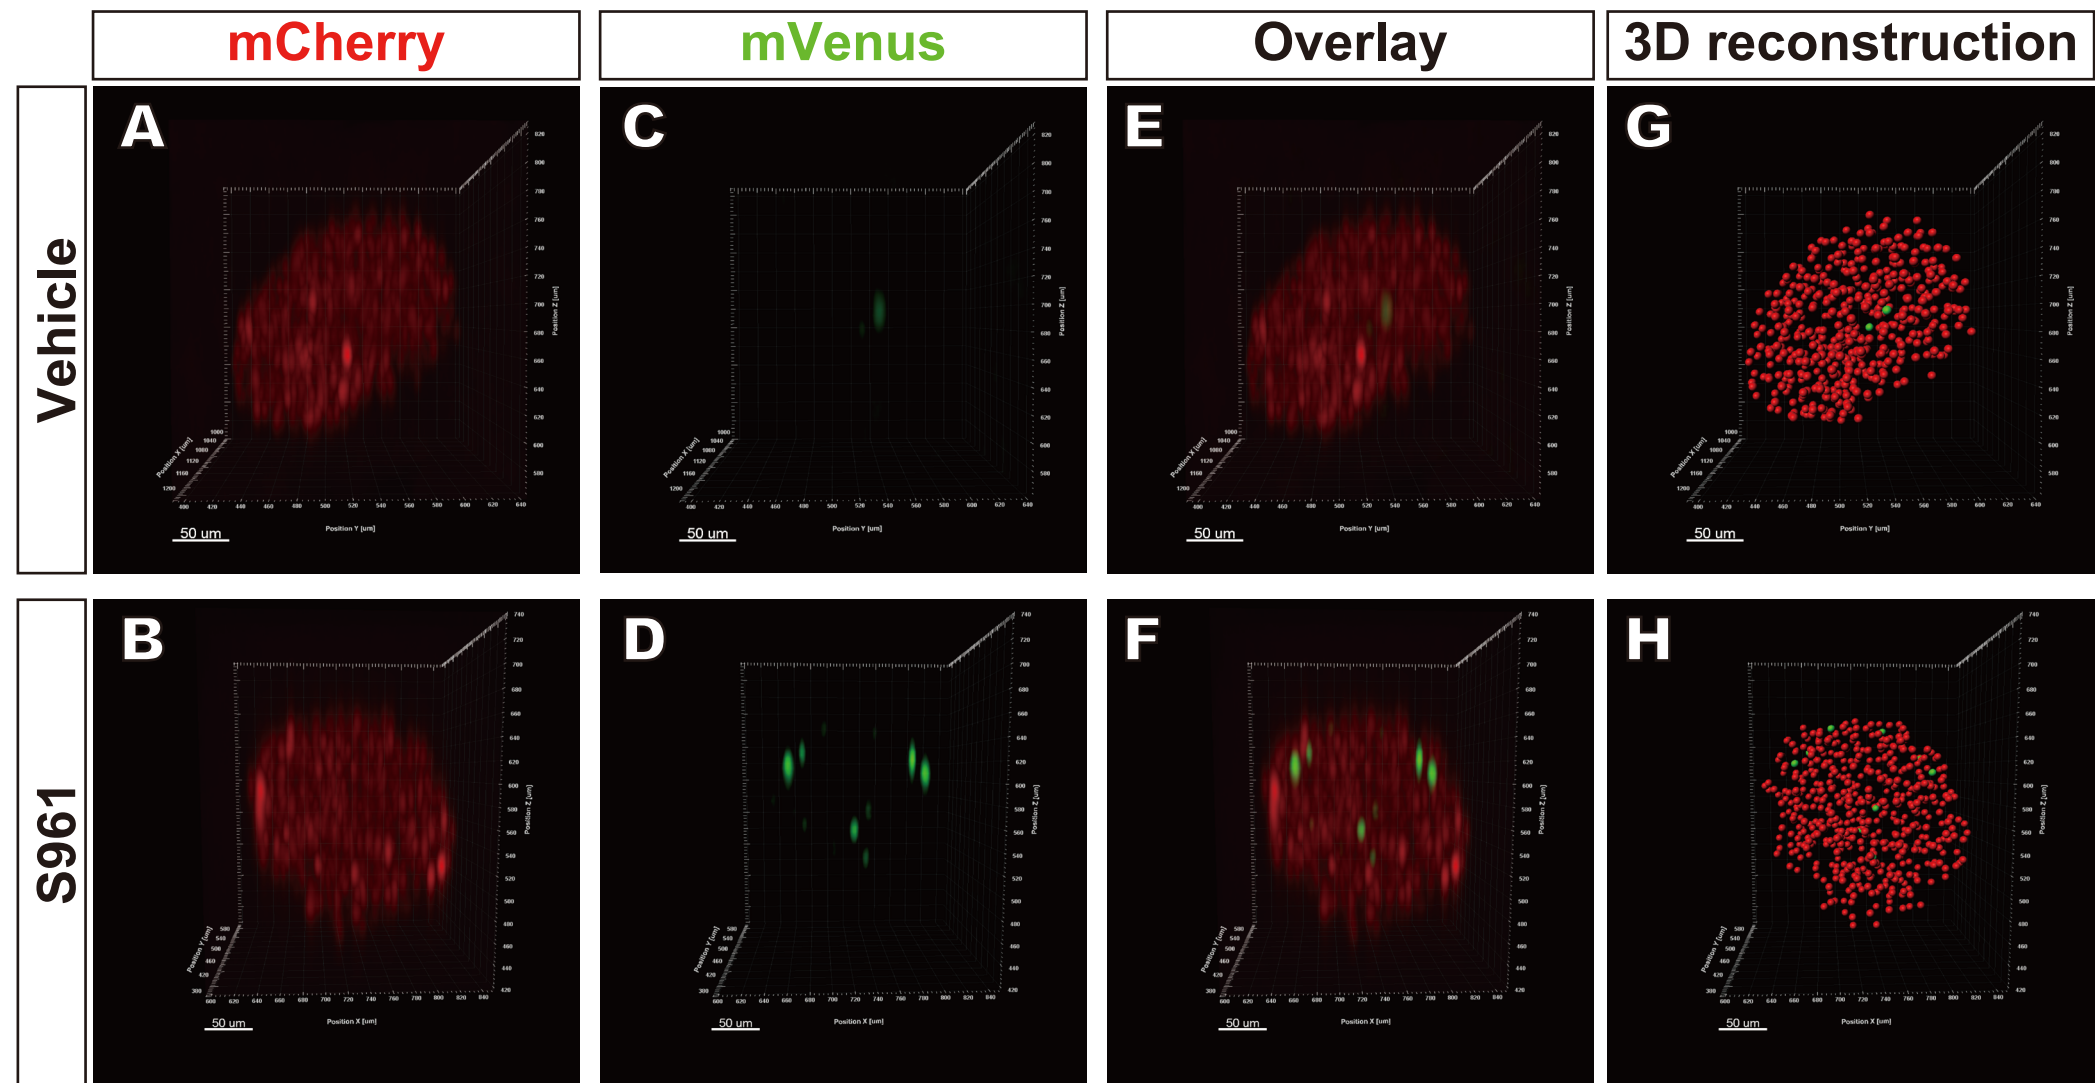



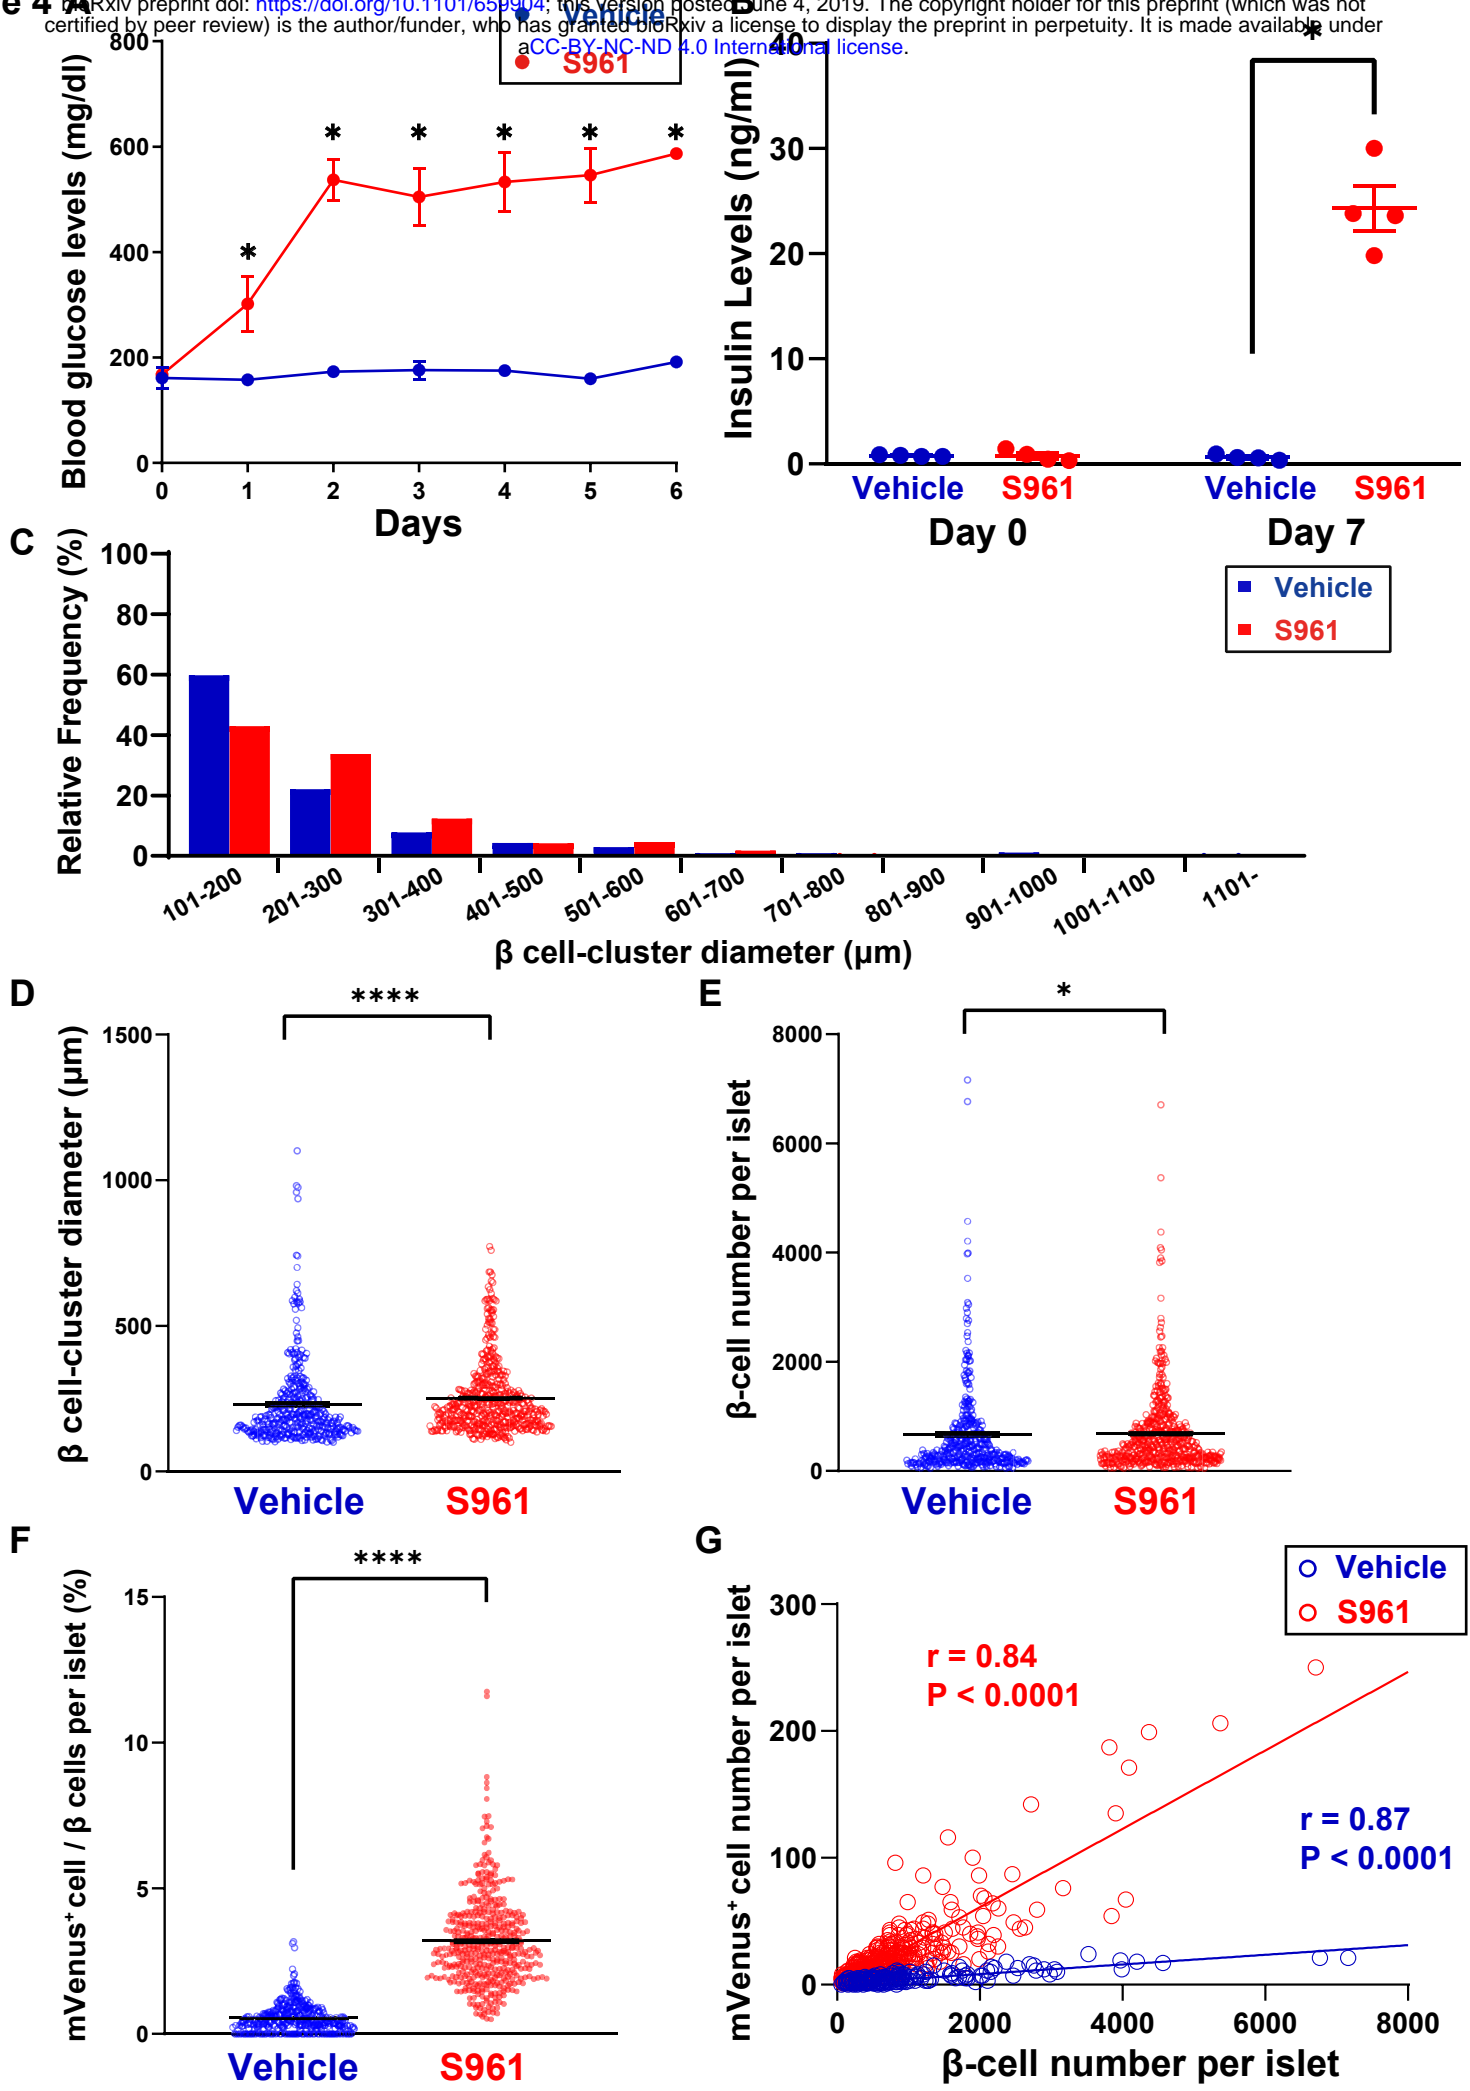

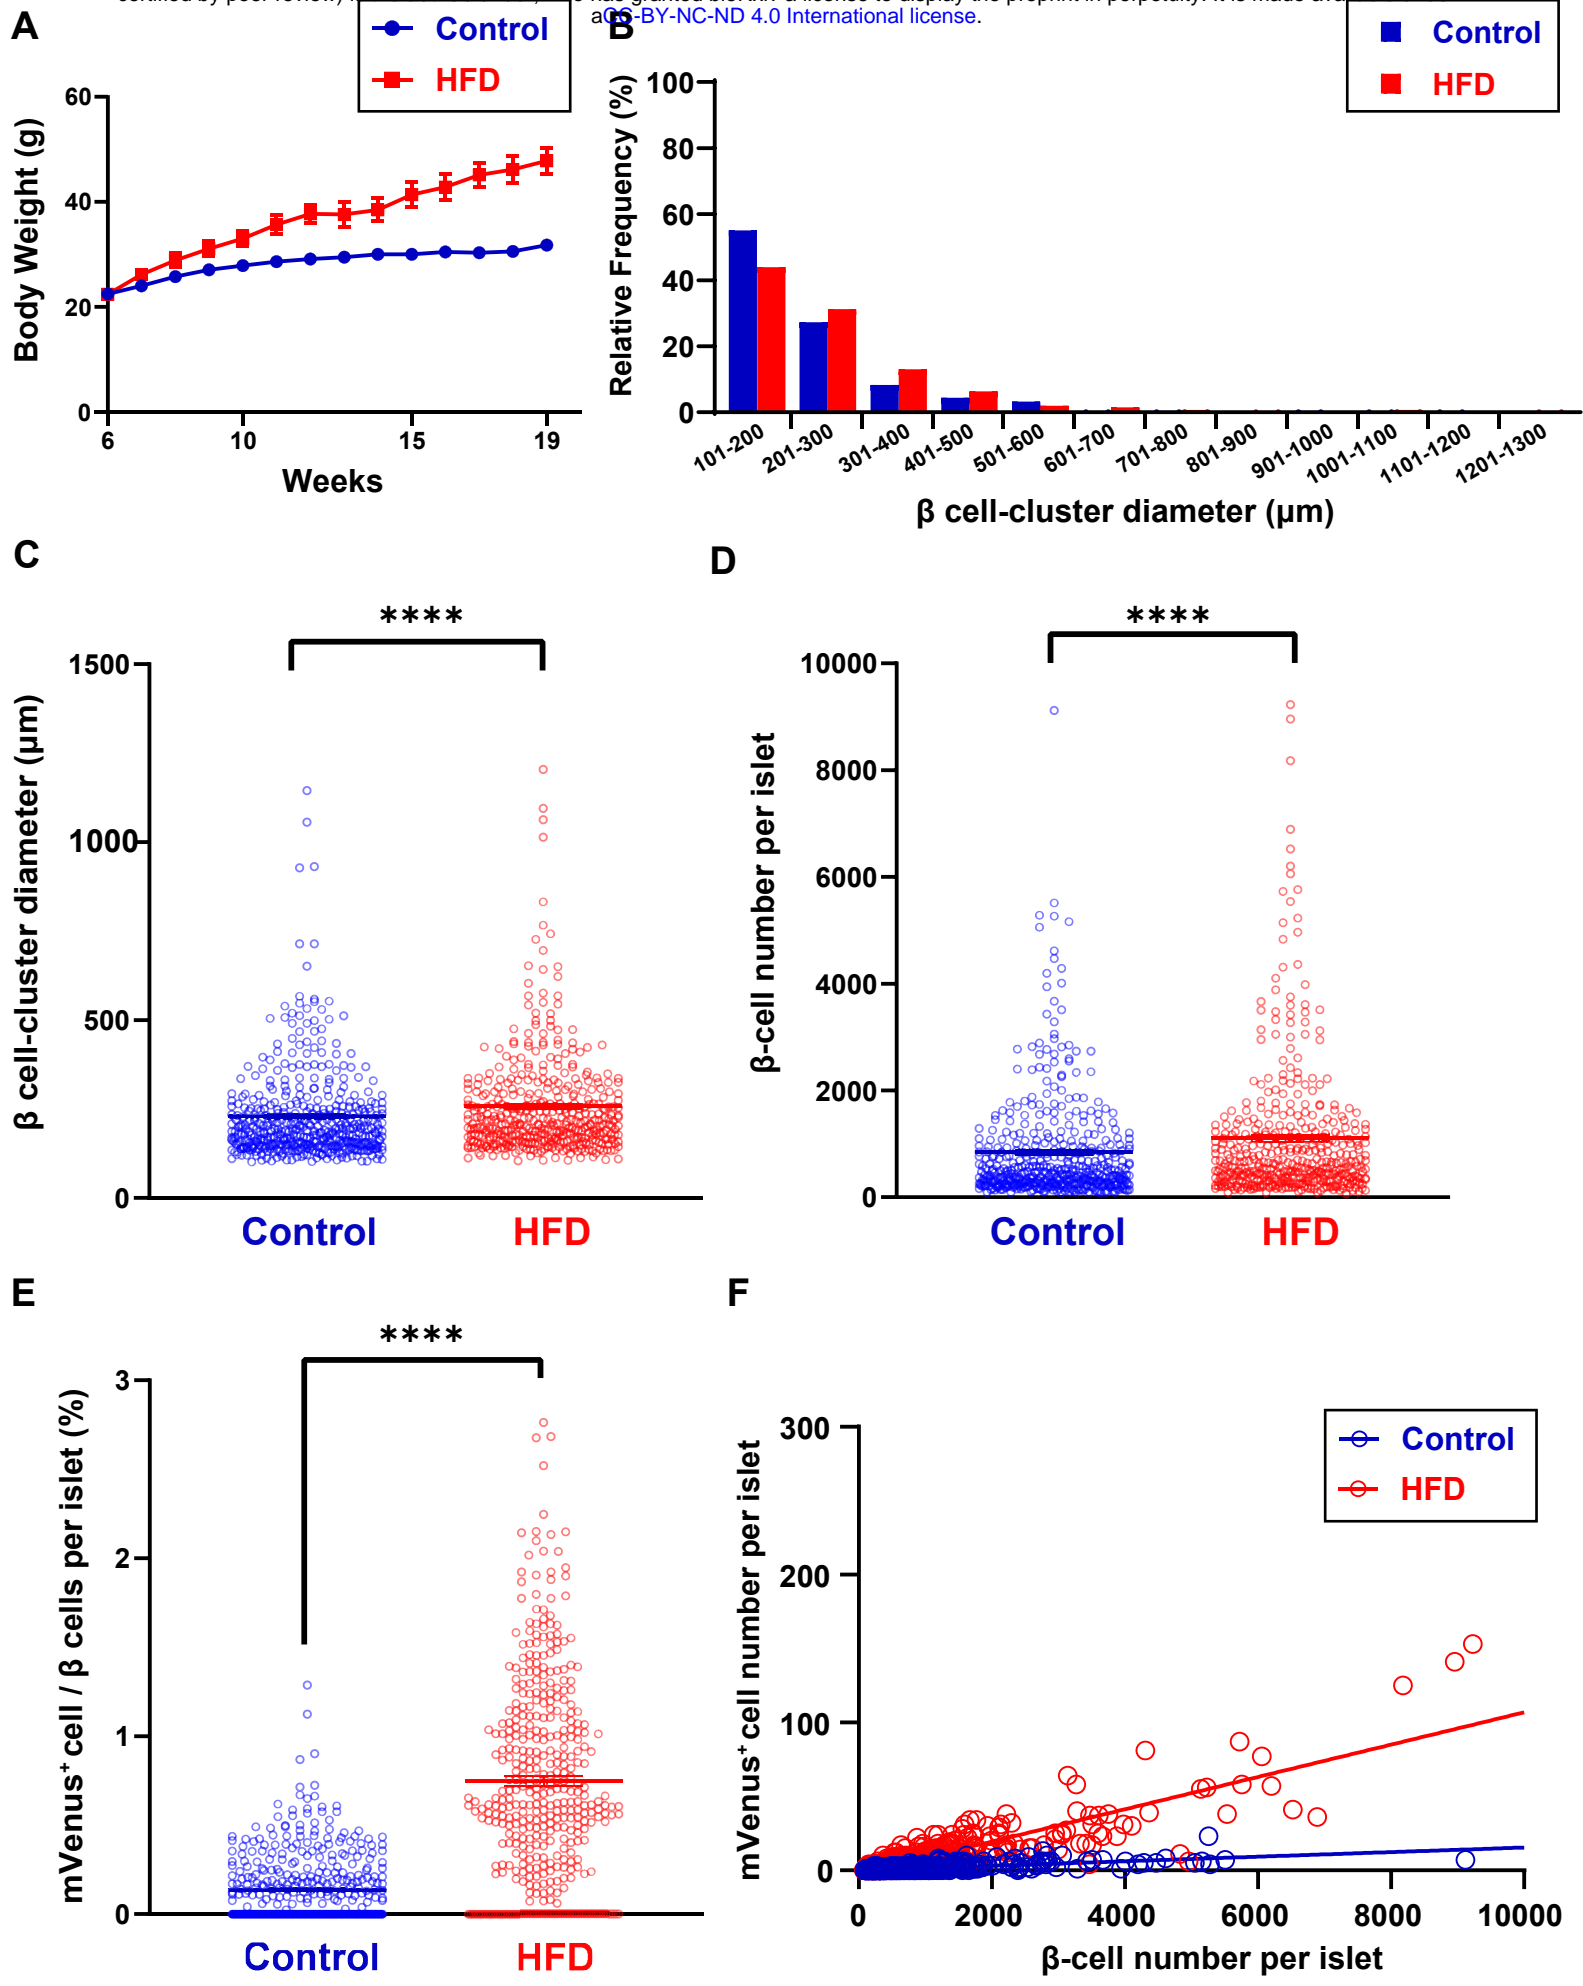

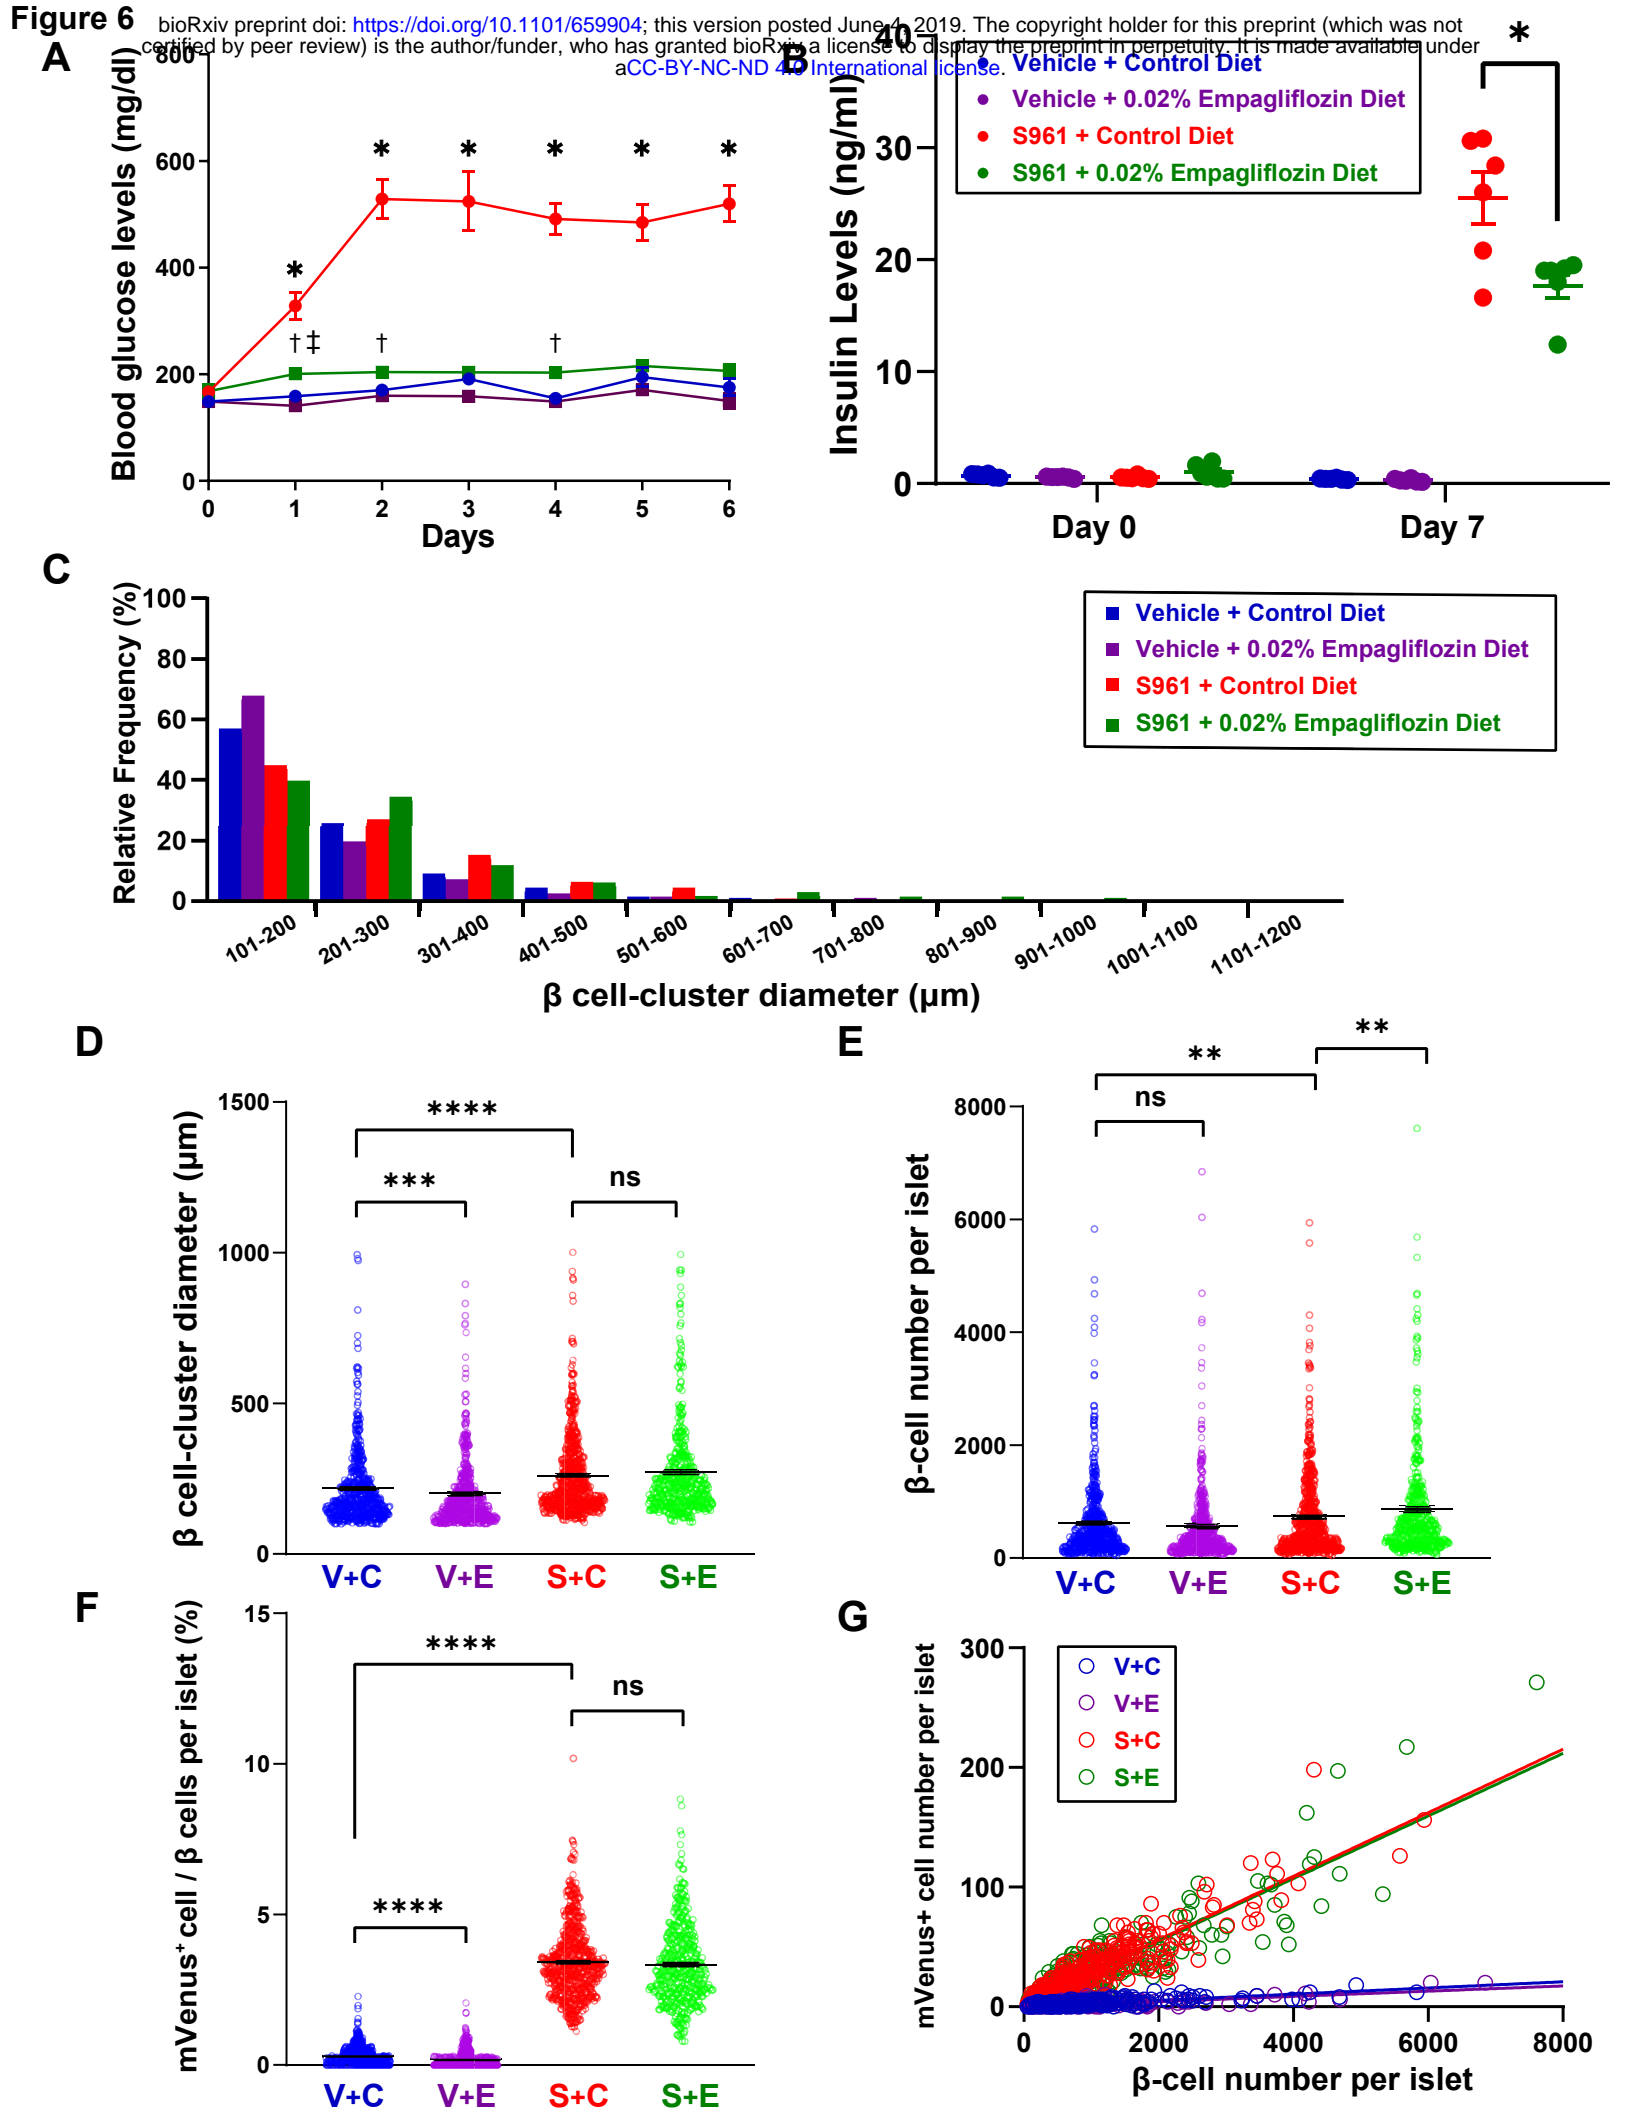

Source: https://www.biorxiv.org/content/10.1101/659904v1.full.pdf
